# Supplementary material for: In vitro mechanical vibration down-regulates pro-inflammatory and pro-fibrotic signaling in human vocal fold fibroblasts
Source: PubMed Central journal article supplement (PMC7676657; doi:10.1371/journal.pone.0241901), 2020-11-19
Supplement: pone.0241901.s004.pdf [file pone.0241901.s004.pdf]

### 3. Material and Methods

#### 3.1. Material

##### 3.1.1. General laboratory equipment

| Product                                                        | Company                                 | CAS/Ref    |
|----------------------------------------------------------------|-----------------------------------------|------------|
| Cell culture flask 250 ml 75 cm <sup>2</sup>                   | Greiner Bio-One GmbH; Germany           | 658175     |
| Cell culture flask 50 ml 25 cm <sup>2</sup>                    | Greiner Bio-One GmbH; Germany           | 690175     |
| Bioflex <sup>®</sup> culture plate + pronectin,<br>C557155     | Flexcell <sup>®</sup> Int. Corp.; USA   | BF3001P    |
| Nunclon Multidish 24 well                                      | Thermo Scientific; Denmark              | 142475     |
| Serological Pipette 5 ml                                       | Corning Incorporated; USA               | 4051       |
| Serological Pipette 10 ml                                      | Corning Incorporated USA                | 4101       |
| Serological Pipette 25 ml                                      | Corning Incorporated; USA               | 4251       |
| ART <sup>®</sup> 10 µl Barrier Tip, sterile                    | Thermo Scientific, USA                  | 2140       |
| ART <sup>®</sup> 20 µl Barrier Tip, sterile                    | Thermo Scientific, USA                  | 2149P      |
| ART <sup>®</sup> 100 µl Barrier Tip, sterile                   | Thermo Scientific, USA                  | 2065E      |
| ART <sup>®</sup> 200 µl Barrier Tip, sterile                   | Thermo Scientific, USA                  | 2069       |
| ART <sup>®</sup> 1000 µl Barrier Tip, XL, sterile              | Thermo Scientific, USA                  | 2079-05-HR |
| Cell Scraper, sterile                                          | Corning Incorporated; USA               | 3010       |
| Falcon 15 ml Polypropylene Conical<br>Tube                     | Corning Science; Mexico                 | 352095     |
| Falcon 50 ml Polypropylene Conical<br>Tube                     | Corning Science; Mexico                 | 352070     |
| Milli-Q <sup>®</sup> Reference A+ Water<br>Purification System | Merck KGaA, Germany                     |            |
| Millipak <sup>®</sup> Express 0.22 µm                          | Merck KGaA, Germany                     | MPGP02001  |
| CombiTips advanced 10 ml                                       | Eppendorf, Germany                      | 0030089464 |
| CombiTip 5 ml                                                  | Eppendorf, Germany                      | 0030089456 |
| Ethanol denatured ≥99.8 %                                      | Roth GmbH & Co KG; Germany              | K928.3     |
| Nitril <sup>®</sup> 3000 Gloves                                | Meditrade                               | 1280       |
| Bacillol 30 Tissues                                            | Hartmann                                |            |
| 0.2 µm filter unit                                             | Whatman <sup>™</sup> , GE Healthcare UK | 10462200   |

|                                                               |                            |               |
|---------------------------------------------------------------|----------------------------|---------------|
| QIAzol <sup>®</sup> Lysis Reagent                             | QIAGEN Sciences; USA       | 56008534      |
| RNase AWAY                                                    | Molecular BioProducts; USA | #7003         |
| QuantiTect <sup>®</sup> Reverse Transcription Kit             | QIAGEN GmbH; Germany       | 64-17-5       |
| Ethanol absolute 99,9 % for analysis,<br>Rotipur <sup>®</sup> | AustrAlco                  | 1.009.832.511 |
| Chloroform Rotipuran <sup>®</sup> ≥99 %, p.a.                 | Carl Roth, Germany         | 3313.1        |

#### 3.1.4. LDH Assay

| Product                                        | Company                | CAS/Ref |
|------------------------------------------------|------------------------|---------|
| Pierce <sup>™</sup> LDH Cytotoxicity Assay Kit | Thermo Scientific; USA | 88954   |
| 96 well BRANDplates, clear                     | BRAND, Germany         | 781602  |

#### 3.1.5. qPCR

| Product                                                                           | Company          | CAS/Ref  |
|-----------------------------------------------------------------------------------|------------------|----------|
| GoTaq qPCR Mastermix (2x)                                                         | Promega; USA     | A600A    |
| Nuclease-Free Water                                                               | Promega; USA     | P119E    |
| FrameStar <sup>®</sup> 384 Well Skirted PCR Plate,<br>Roche Style, Plus qPCR Seal | 4titude Ltd.; UK | 4ti-0382 |

#### 3.1.6. Western Blot

| Product                                                               | Company                | CAS/Ref   |
|-----------------------------------------------------------------------|------------------------|-----------|
| RIPA Buffer (5x)                                                      | Cell Biolabs INC.      | AKR-191   |
| SuperSignal <sup>™</sup> West Pico PLUS<br>Chemiluminescent Substrate | Thermo Scientific; USA | 34578     |
| Precision Plus Protein <sup>™</sup> Standard Dual<br>Color            | Biorad                 | #161-0374 |
| Tris Buffered Saline (TBS, 10x)                                       | Biorad                 | #1706435  |
| Tris/Glycerin/SDS buffer (TGS, 10x)                                   | Biorad                 | #161-0732 |
| Restore <sup>™</sup> PLUS Western Blot Stripping<br>Buffer            | Thermo Scientific; USA | 46430     |
| Tween <sup>®</sup> 20 viscous liquid                                  | Sigma-Aldrich          | P1379     |
| Laemmli Sample Buffer (4x)                                            | Biorad                 | #161-0747 |
